# Supplementary material
Source: Royal Society of Chemistry journal article supplement (doi:10.1039/d6mh00065g)
Supplement: d6mh00065g1.pdf [file d6mh00065g1.pdf]

## Supporting Information for:

# Rapid Ambient Direct Growth of HKUST-1 via Atmospheric Pressure Plasma Treatment

Moriyuki Kanno,<sup>\*1,2</sup> Tsuyohito Ito,<sup>2</sup> Itaru Honma,<sup>1</sup> and Kazuo Terashima<sup>\*2</sup>

1 Institute of multidisciplinary research for advanced materials, Tohoku University, 2-1-1 Katahira, Aoba-ku, Sendai, Miyagi, 980-8577, Japan

2 Department of Advanced Materials Science, Graduate School of Frontier Sciences, The University of Tokyo, 5-1-5 Kashiwanoha, Kashiwa, Chiba, 277-8561 Japan

\*Email: [moriyuki.kanno.e4@tohoku.ac.jp](mailto:moriyuki.kanno.e4@tohoku.ac.jp)

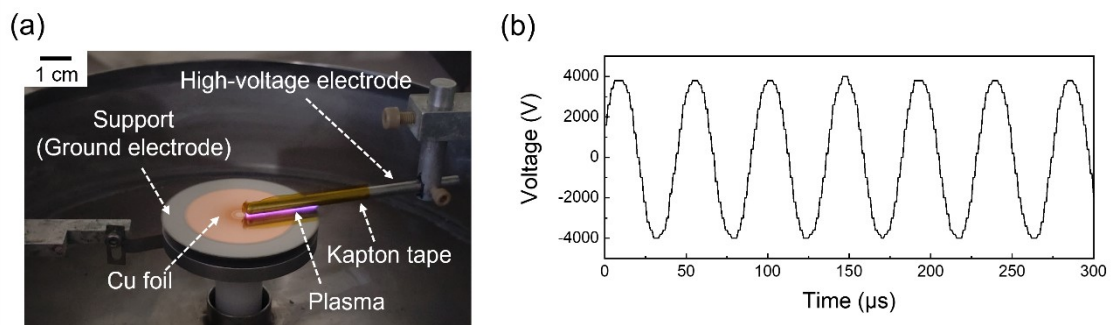

Figure S1. Experimental setup and electrical characteristics of the plasma-assisted synthesis. (a) Photograph of the atmospheric-pressure plasma treatment system irradiating the copper substrate. The grounded rotating electrode used as the substrate holder has a diameter of 50 mm. (b) Typical voltage waveform applied during the synthesis process.

Table S1. Comprehensive summary of reaction outcomes for different metal substrates and ligands under plasma, solvothermal, and chemical precipitation conditions. Film: Formation of continuous crystalline MOF film. Amorph.: Formation of amorphous surface products. Powder: Precipitation of crystalline coordination polymers from solution. N.R.: No reaction observed (surface remained unchanged or solution remained clear).

| Method         | Precursor Source | Ligand             | Cu     | Zn      | Ni     | Al     |
|----------------|------------------|--------------------|--------|---------|--------|--------|
| Plasma         | Metal Foil       | H <sub>3</sub> BTC | Film   | Amorph. | N.R.   | N.R.   |
| Solvothermal   | Metal Foil       | H <sub>3</sub> BTC | N.R.   | N.R.    | N.R.   | N.R.   |
| Solvothermal   | Nitrate Salt     | H <sub>3</sub> BTC | Powder | Powder  | Powder | Powder |
| Amine Addition | Nitrate Salt     | H <sub>3</sub> BTC | Powder | Powder  | Powder | N.R.   |
| Plasma         | Metal Foil       | 2-MIM              | N.R.   | N.R.    | N.R.   | N.R.   |
| Solvothermal   | Metal Foil       | 2-MIM              | N.R.   | N.R.    | N.R.   | N.R.   |
| Solvothermal   | Nitrate Salt     | 2-MIM              | N.R.   | N.R.    | N.R.   | N.R.   |
| Amine Addition | Nitrate Salt     | 2-MIM              | N.R.   | Powder  | N.R.   | N.R.   |

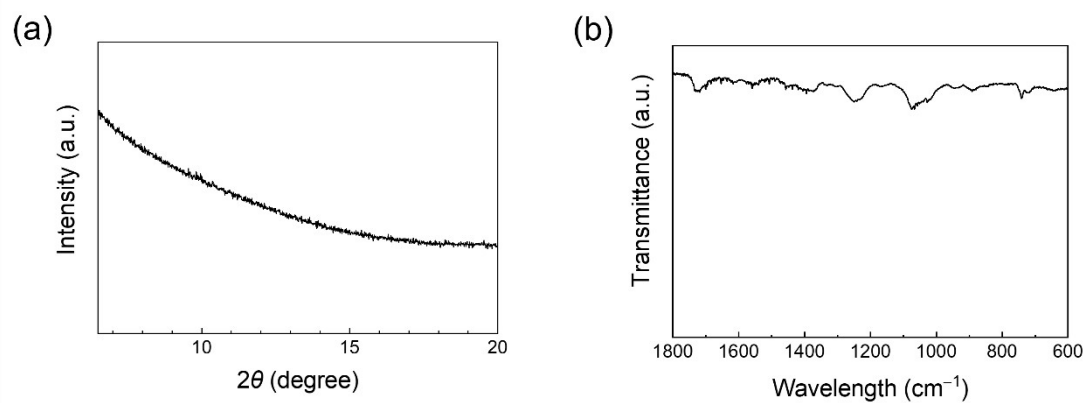

Figure S2. Control experiment examining the effect of thermal energy on film growth. (a) XRD pattern and (b) FTIR spectrum of the copper foil treated with the H<sub>3</sub>BTC/EG solution in a solvothermal autoclave at 150 °C for 24 h. The absence of characteristic HKUST-1 peaks confirms that thermal energy alone is insufficient to drive the reaction in the reductive EG environment.

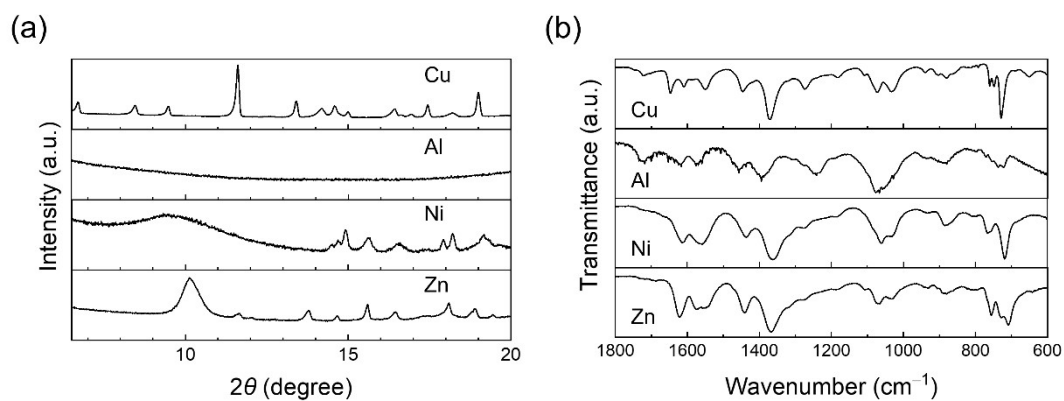

Figure S3. Verification of chemical coordination capability using metal salts. XRD patterns and FTIR spectra of the solid products obtained by solvothermal reaction of metal nitrates ( $\text{Cu}(\text{NO}_3)_2$ ,  $\text{Zn}(\text{NO}_3)_2$ ,  $\text{Ni}(\text{NO}_3)_2$ , and  $\text{Al}(\text{NO}_3)_3$ ) with the  $\text{H}_3\text{BTC}/\text{EG}$  solution in a solvothermal autoclave at 150 °C for 24 h. The formation of precipitations for all metals were confirmed.
